# Supplementary material
Source: HighWire-hosted journal article supplement (http://cmajopen.ca/highwire/filestream/81251/field_highwire_adjunct_files/0/2019-0137-1-at.pdf)
Supplement: 2019-0137-1-at.pdf [file 2019-0137-1-at.pdf]

**Appendix 1 (as supplied by the authors): Key features of the circadian rhythm sleep-wake disorders diagnosed in this study**

| <b>Circadian Disorder</b>          | <b>Characteristic sleep pattern</b>                                                                                 | <b>Main clinical features</b>                                                                                                                                                                                                                                                                                                   | <b>Epidemiology</b>                                                                                                                                                                                                                                   | <b>Treatment</b>                                                                                                                                                                                                       |
|------------------------------------|---------------------------------------------------------------------------------------------------------------------|---------------------------------------------------------------------------------------------------------------------------------------------------------------------------------------------------------------------------------------------------------------------------------------------------------------------------------|-------------------------------------------------------------------------------------------------------------------------------------------------------------------------------------------------------------------------------------------------------|------------------------------------------------------------------------------------------------------------------------------------------------------------------------------------------------------------------------|
| Delayed sleep-wake phase disorder  | Delayed main sleep episode (usually by at least two hours) relative to the socially desired or required sleep time. | <ul style="list-style-type: none"> <li>• Sleep initiation insomnia and difficulty with waking when sleep schedule is socially imposed, but significantly improved sleep when sleep schedule is freely chosen.</li> <li>• Excessive sleepiness in the morning.</li> <li>• Risk for the development of mood disorders.</li> </ul> | <ul style="list-style-type: none"> <li>• Usually starts in adolescence.</li> <li>• Prevalence in general population: 0.17% - 1.53%</li> <li>• 5-10% of individuals with chronic insomnia in sleep clinics</li> </ul>                                  | <ul style="list-style-type: none"> <li>• Strategically timed oral melatonin based on DLMO<sup>c,ad,a</sup></li> <li>• Post-awakening light therapy in conjunction with behavioral treatment <sup>c,ad</sup></li> </ul> |
| Advanced sleep-wake phase disorder | Advanced main sleep episode (at least by two hours) relative to the socially desired or required sleep time         | <ul style="list-style-type: none"> <li>• Inability to stay awake until the socially desirable time in the evening and inability to remain asleep until a socially desirable wake time.</li> </ul>                                                                                                                               | <ul style="list-style-type: none"> <li>• Approximately 1% of the general population has advanced sleep phase</li> <li>• Prevalence of advanced sleep-wake phase disorder in the general population and in sleep clinic insomnia samples is</li> </ul> | <ul style="list-style-type: none"> <li>• Evening light therapy</li> </ul>                                                                                                                                              |

|                                                                                                             |                                                                                                   |                                                                                                              |                                                                                                                                    |                                                                                                                                                 |
|-------------------------------------------------------------------------------------------------------------|---------------------------------------------------------------------------------------------------|--------------------------------------------------------------------------------------------------------------|------------------------------------------------------------------------------------------------------------------------------------|-------------------------------------------------------------------------------------------------------------------------------------------------|
|                                                                                                             |                                                                                                   | <ul style="list-style-type: none"> <li>Excessive sleepiness in the evening.</li> </ul>                       | unknown but thought to be rare.                                                                                                    |                                                                                                                                                 |
| Irregular sleep-wake rhythm disorder                                                                        | Irregular sleep episodes typically shorter than 4 hours; total 24 h sleep duration can be normal. | <ul style="list-style-type: none"> <li>Insomnia at night and excessive sleepiness during the day.</li> </ul> | <ul style="list-style-type: none"> <li>Described in neuro-developmental and neuro-degenerative disorders and after TBI.</li> </ul> | <ul style="list-style-type: none"> <li>Light therapy in elderly patients with dementia</li> <li>Melatonin <sup>c,</sup><sub>ad</sub></li> </ul> |
| Note: TBI: traumatic brain injury; DLMO: dim light melatonin onset; c: children; ad: adolescents; a: adults |                                                                                                   |                                                                                                              |                                                                                                                                    |                                                                                                                                                 |

## Reference

- Auger RR, Burgess HJ, Emens JS, Deriy LV, Thomas SM, Sharkey KM. Clinical Practice Guideline for the Treatment of Intrinsic Circadian Rhythm Sleep-Wake Disorders: Advanced Sleep-Wake Phase Disorder (ASWPD), Delayed Sleep-Wake Phase Disorder (DSWPD), Non-24-Hour Sleep-Wake Rhythm Disorder (N24SWD), and Irregular Sleep-Wake Rhythm Disorder (ISWRD). An Update for 2015: An American Academy of Sleep Medicine Clinical Practice Guideline. *Journal of clinical sleep medicine : JCSM : official publication of the American Academy of Sleep Medicine*. 2015;11(10):1199-236.
